# Supplementary material
Source: Springer Nature journal article supplement (https://www.springermedizin.de/resource/supplementary/12891_2014_2393_MOESM3_ESM.pdf/9510116)
Supplement: MOESM3 [file 9510116]

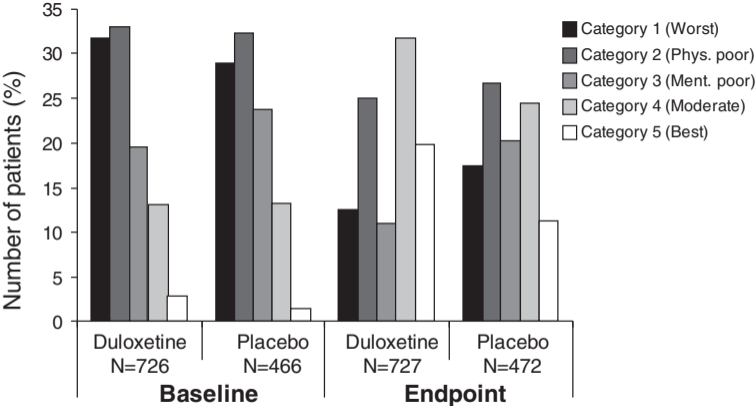

N = number of evaluable patients at baseline and endpoint (Week 2-12, LOCF)
